# Supplementary material
Source: PubMed Central journal article supplement (PMC10842113)
Supplement: NIHMS1938038-supplement-1.pdf [file NIHMS1938038-supplement-1.pdf]

## **Appendix A**

In Appendix Table A-1 through Appendix Table A-4, we list the counties that are used in the final sample. We should note that not all counties have pollution data for all years. The counties in this table are those that were used for at least a year in the final sample. However, for the years that they do have pollution data, the data is available in all months.

**Appendix Table A-1 - List of Counties in the Final Sample**

|                           |                          |                            |                          |                            |
|---------------------------|--------------------------|----------------------------|--------------------------|----------------------------|
| Abbeville, South Carolina | Barnwell, South Carolina | Burleigh, North Dakota     | Chemung, New York        | Contra Costa, California   |
| Ada, Idaho                | Bartholomew, Indiana     | Burlington, New Jersey     | Cherokee, Georgia        | Converse, Wyoming          |
| Adair, Oklahoma           | Bay, Florida             | Butler, Ohio               | Cherokee, Oklahoma       | Cook, Illinois             |
| Adams, Colorado           | Beaufort, South Carolina | Butte, California          | Cherokee, South Carolina | Coos, New Hampshire        |
| Adams, Illinois           | Beauregard, Louisiana    | Butte, Idaho               | Cheshire, New Hampshire  | Cotton, Oklahoma           |
| Adams, Mississippi        | Beaver, Pennsylvania     | Cabell, West Virginia      | Chester, Pennsylvania    | Coweta, Georgia            |
| Adams, Pennsylvania       | Becker, Minnesota        | Cache, Utah                | Chester, South Carolina  | Cowlitz, Washington        |
| Aiken, South Carolina     | Belknap, New Hampshire   | Caddo, Louisiana           | Chesterfield, S Carolina | Creek, Oklahoma            |
| Alachua, Florida          | Bell, Kentucky           | Caddo, Oklahoma            | Chesterfield, Virginia   | Crittenden, Arkansas       |
| Alameda, California       | Bell, Texas              | Calaveras, California      | Chippewa, Michigan       | Crow Wing, Minnesota       |
| Alamosa, Colorado         | Bennington, Vermont      | Calcasieu, Louisiana       | Chippewa, Wisconsin      | Culberson, Texas           |
| Albany, New York          | Benzie, Michigan         | Caldwell, North Carolina   | Chittenden, Vermont      | Cumberland, Maine          |
| Albany, Wyoming           | Bergen, New Jersey       | Callaway, Missouri         | Choctaw, Mississippi     | Cumberland, New Jersey     |
| Albemarle, Virginia       | Berkeley, South Carolina | Calvert, Maryland          | Choctaw, Oklahoma        | Cumberland, N Carolina     |
| Alcorn, Mississippi       | Berkeley, West Virginia  | Cambria, Pennsylvania      | Christian, Kentucky      | Custer, South Dakota       |
| Alexander, North Carolina | Berks, Pennsylvania      | Camden, New Jersey         | Churchill, Nevada        | Cuyahoga, Ohio             |
| Alexandria city, Virginia | Berkshire, Massachusetts | Camden, North Carolina     | Clackamas, Oregon        | Daggett, Utah              |
| Allegan, Michigan         | Bernalillo, New Mexico   | Cameron, Texas             | Claiborne, Tennessee     | Dakota, Minnesota          |
| Allegany, Maryland        | Berrien, Michigan        | Campbell, Kentucky         | Clallam, Washington      | Dallas, Texas              |
| Allegheny, Pennsylvania   | Bexar, Texas             | Campbell, Wyoming          | Clark, Arkansas          | Dane, Wisconsin            |
| Allen, Indiana            | Bibb, Georgia            | Canadian, Oklahoma         | Clark, Illinois          | Darlington, South Carolina |
| Allen, Ohio               | Big Horn, Wyoming        | Canyon, Idaho              | Clark, Indiana           | Dauphin, Pennsylvania      |
| Amador, California        | Billings, North Dakota   | Carbon, Utah               | Clark, Nevada            | Davidson, Tennessee        |
| Amherst, Virginia         | Blair, Pennsylvania      | Carbon, Wyoming            | Clark, Ohio              | Davie, North Carolina      |
| Anchorage; Alaska         | Blount, Tennessee        | Carlton, Minnesota         | Clark, Washington        | Daviess, Kentucky          |
| Anderson, South Carolina  | Bolivar, Mississippi     | Caroline, Virginia         | Clarke, Georgia          | Davis, Utah                |
| Anderson, Tennessee       | Boone, Indiana           | Carroll, Indiana           | Clay, Alabama            | Dawson, Georgia            |
| Andrew, Missouri          | Boone, Kentucky          | Carroll, Maryland          | Clay, Missouri           | De Kalb, Alabama           |
| Androscoggin, Maine       | Boone, Missouri          | Carroll, New Hampshire     | Clear Creek, Colorado    | De Kalb, Georgia           |
| Anne Arundel, Maryland    | Bossier, Louisiana       | Carson City, Nevada        | Clearfield, Pennsylvania | De Kalb, Indiana           |
| Anoka, Minnesota          | Boulder, Colorado        | Carter, Kentucky           | Clermont, Ohio           | De Kalb, Tennessee         |
| Apache, Arizona           | Box Elder, Utah          | Carter, Oklahoma           | Cleveland, Oklahoma      | De Soto, Mississippi       |
| Arapahoe, Colorado        | Boyd, Kentucky           | Carteret, North Carolina   | Clinton, Iowa            | Del Norte, California      |
| Archuleta, Colorado       | Bradford, Pennsylvania   | Cass, Michigan             | Clinton, Michigan        | Delaware, Indiana          |
| Arlington, Virginia       | Bradley, Tennessee       | Cass, Missouri             | Clinton, Missouri        | Delaware, Ohio             |
| Armstrong, Pennsylvania   | Brazoria, Texas          | Cass, North Dakota         | Clinton, Ohio            | Delaware, Pennsylvania     |
| Aroostook, Maine          | Bremer, Iowa             | Cassia, Idaho              | Cobb, Georgia            | Denton, Texas              |
| Ascension, Louisiana      | Brevard, Florida         | Caswell, North Carolina    | Cochise, Arizona         | Denver, Colorado           |
| Ashland, Wisconsin        | Brewster, Texas          | Cecil, Maryland            | Coconino, Arizona        | Dewey, Oklahoma            |
| Ashtabula, Ohio           | Bristol, Massachusetts   | Cedar, Missouri            | Coffee, Tennessee        | Dickinson, Michigan        |
| Athens, Ohio              | Brookings, South Dakota  | Centre, Pennsylvania       | Colbert, Alabama         | Dickson, Tennessee         |
| Atlantic, New Jersey      | Broward, Florida         | Chaffee, Colorado          | Colleton, South Carolina | Dodge, Wisconsin           |
| Augusta, Virginia         | Brown, Indiana           | Champaign, Illinois        | Collier, Florida         | Dona Ana, New Mexico       |
| Autauga, Alabama          | Brown, Wisconsin         | Charles City, Virginia     | Collin, Texas            | Door, Wisconsin            |
| Avery, North Carolina     | Bryan, Oklahoma          | Charles, Maryland          | Columbia, Florida        | Dorchester, Maryland       |
| Baker, Florida            | Bucks, Pennsylvania      | Charleston, South Carolina | Columbia, Georgia        | Douglas, Colorado          |
| Baldwin, Alabama          | Bullitt, Kentucky        | Chatham, Georgia           | Columbia, Oregon         | Douglas, Georgia           |
| Baltimore city, Maryland  | Buncombe, North Carolina | Chatham, North Carolina    | Columbia, Wisconsin      | Douglas, Kansas            |
| Baltimore, Maryland       | Burke, North Carolina    | Chattooga, Georgia         | Colusa, California       | Douglas, Nebraska          |
| Barnstable, Massachusetts | Burke, North Dakota      | Chautauqua, New York       | Comanche, Oklahoma       | Douglas, Nevada            |

**Appendix Table A-2 - List of Counties in the Final Sample**

|                           |                            |                             |                          |                          |
|---------------------------|----------------------------|-----------------------------|--------------------------|--------------------------|
| Du Page, Illinois         | Fort Bend, Texas           | Hamblen, Tennessee          | Huron, Michigan          | Kern, California         |
| Duchesne, Utah            | Franklin, Massachusetts    | Hamilton, Illinois          | Huron, Ohio              | Kewaunee, Wisconsin      |
| Dukes, Massachusetts      | Franklin, Mississippi      | Hamilton, Indiana           | Iberville, Louisiana     | King, Washington         |
| Dunn, North Dakota        | Franklin, New York         | Hamilton, New York          | Idaho, Idaho             | Kings, California        |
| Duplin, North Carolina    | Franklin, North Carolina   | Hamilton, Ohio              | Imperial, California     | Kleberg, Texas           |
| Durham, North Carolina    | Franklin, Ohio             | Hamilton, Tennessee         | Indian River, Florida    | Klickitat, Washington    |
| Dutchess, New York        | Franklin, Pennsylvania     | Hampden, Massachusetts      | Indiana, Pennsylvania    | Knox, Indiana            |
| Duval, Florida            | Frederick, Maryland        | Hampshire, Massachusetts    | Ingham, Michigan         | Knox, Maine              |
| Dyer, Tennessee           | Frederick, Virginia        | Hampton city, Virginia      | Inyo, California         | Knox, Nebraska           |
| Baton Rouge, Louisiana    | Fremont, Wyoming           | Hancock, Indiana            | Jackson, Alabama         | Knox, Ohio               |
| Eau Claire, Wisconsin     | Fresno, California         | Hancock, Kentucky           | Jackson, Colorado        | Knox, Tennessee          |
| Eddy, New Mexico          | Fulton, Georgia            | Hancock, Maine              | Jackson, Indiana         | Koochiching, Minnesota   |
| Edgecombe, N Carolina     | Galveston, Texas           | Hancock, Mississippi        | Jackson, Mississippi     | Kootenai, Idaho          |
| Edgefield, South Carolina | Garfield, Colorado         | Hancock, West Virginia      | Jackson, Missouri        | La Crosse, Wisconsin     |
| Edmonson, Kentucky        | Garfield, Utah             | Hanover, Virginia           | Jackson, North Carolina  | La Plata, Colorado       |
| Effingham, Illinois       | Garrett, Maryland          | Hardin, Kentucky            | Jackson, Oregon          | La Porte, Indiana        |
| El Dorado, California     | Geauga, Ohio               | Hardin, Texas               | Jackson, South Dakota    | Lackawanna, Pennsylvania |
| El Paso, Colorado         | Genesee, Michigan          | Harford, Maryland           | Jasper, Missouri         | Lafayette, Louisiana     |
| El Paso, Texas            | Geneva, Alabama            | Harris, Texas               | Jefferson, Alabama       | Lafourche, Louisiana     |
| Elk, Pennsylvania         | Gibson, Indiana            | Harrison, Iowa              | Jefferson, Colorado      | Lake, California         |
| Elkhart, Indiana          | Gila, Arizona              | Harrison, Mississippi       | Jefferson, Kentucky      | Lake, Florida            |
| Ellis, Texas              | Giles, Tennessee           | Harrison, Texas             | Jefferson, Louisiana     | Lake, Illinois           |
| Elmore, Alabama           | Giles, Virginia            | Hartford, Connecticut       | Jefferson, Missouri      | Lake, Indiana            |
| Elmore, Idaho             | Gillespie, Texas           | Hawaii, Hawaii              | Jefferson, New York      | Lake, Minnesota          |
| Erie, New York            | Gilmer, West Virginia      | Hays, Texas                 | Jefferson, Ohio          | Lake, Ohio               |
| Erie, Pennsylvania        | Glenn, California          | Haywood, North Carolina     | Jefferson, Oklahoma      | Lamar, Mississippi       |
| Escambia, Florida         | Gloucester, New Jersey     | Haywood, Tennessee          | Jefferson, Tennessee     | Lancaster, Nebraska      |
| Essex, Massachusetts      | Glynn, Georgia             | Henderson, Kentucky         | Jefferson, Texas         | Lancaster, Pennsylvania  |
| Essex, New Jersey         | Goodhue, Minnesota         | Hendricks, Indiana          | Jefferson, Wisconsin     | Laramie, Wyoming         |
| Essex, New York           | Goshen, Wyoming            | Hennepin, Minnesota         | Jersey, Illinois         | Larimer, Colorado        |
| Etowah, Alabama           | Grafton, New Hampshire     | Henrico, Virginia           | Jessamine, Kentucky      | Latimer, Oklahoma        |
| Fairbanks North, Alaska   | Graham, North Carolina     | Henry, Georgia              | Jo Daviess, Illinois     | Lauderdale, Mississippi  |
| Fairfax city, Virginia    | Grand, Colorado            | Henry, Virginia             | Johnson, Indiana         | Lawrence, Alabama        |
| Fairfax, Virginia         | Grand, Utah                | Herkimer, New York          | Johnson, Iowa            | Lawrence, Indiana        |
| Fairfield, Connecticut    | Grant, Louisiana           | Hidalgo, Texas              | Johnson, Kansas          | Lawrence, Kentucky       |
| Fannin, Georgia           | Grant, New Mexico          | Highlands, Florida          | Johnson, Texas           | Lawrence, Ohio           |
| Fauquier, Virginia        | Granville, North Carolina  | Hillsborough, Florida       | Johnston, North Carolina | Lawrence, Pennsylvania   |
| Fayette, Georgia          | Graves, Kentucky           | Hillsborough, New Hampshire | Johnston, Oklahoma       | Lawrence, Tennessee      |
| Fayette, Ohio             | Green, Wisconsin           | Hinds, Mississippi          | Kalamazoo, Michigan      | Lea, New Mexico          |
| Fayette, Tennessee        | Greenbrier, West Virginia  | Holmes, Florida             | Kanawha, West Virginia   | Leavenworth, Kansas      |
| Fayette, Kentucky         | Greene, Indiana            | Honolulu, Hawaii            | Kane, Illinois           | Lebanon, Pennsylvania    |
| Fergus, Montana           | Greene, Missouri           | Hood, Texas                 | Kaufman, Texas           | Lee, Florida             |
| Flagler, Florida          | Greene, Ohio               | Horry, South Carolina       | Kay, Oklahoma            | Lee, Mississippi         |
| Flathead, Montana         | Greene, Pennsylvania       | Houston, Alabama            | Kennebec, Maine          | Lee, North Carolina      |
| Florence, Wisconsin       | Greenup, Kentucky          | Hudson, New Jersey          | Kenosha, Wisconsin       | Leelanau, Michigan       |
| Floyd, Indiana            | Greenville, South Carolina | Humboldt, California        | Kent, Delaware           | Lehigh, Pennsylvania     |
| Fond du Lac, Wisconsin    | Gregg, Texas               | Humphreys, Tennessee        | Kent, Maryland           | Lenawee, Michigan        |
| Ford, Kansas              | Guilford, North Carolina   | Hunt, Texas                 | Kent, Michigan           | Lenoir, North Carolina   |
| Forest, Wisconsin         | Gunnison, Colorado         | Hunterdon, New Jersey       | Kent, Rhode Island       | Leon, Florida            |
| Forsyth, North Carolina   | Gwinnett, Georgia          | Huntington, Indiana         | Kenton, Kentucky         | Lewis and Clark, Montana |

**Appendix Table A-3 - List of Counties in the Final Sample**

|                         |                             |                             |                            |                            |
|-------------------------|-----------------------------|-----------------------------|----------------------------|----------------------------|
| Lewis, Washington       | Mariposa, California        | Montezuma, Colorado         | Oldham, Kentucky           | Pitt, North Carolina       |
| Liberty, Florida        | Marshall, Mississippi       | Montgomery, Alabama         | Oliver, North Dakota       | Pittsburg, Oklahoma        |
| Licking, Ohio           | Marshall, Oklahoma          | Montgomery, Arkansas        | Olmsted, Minnesota         | Placer, California         |
| Limestone, Alabama      | Marshall, Tennessee         | Montgomery, Iowa            | Oneida, New York           | Platte, Missouri           |
| Lincoln, Missouri       | Martin, Florida             | Montgomery, Kansas          | Oneida, Wisconsin          | Plumas, California         |
| Lincoln, North Carolina | Martin, North Carolina      | Montgomery, Maryland        | Onondaga, New York         | Plymouth, Massachusetts    |
| Lincoln, Oklahoma       | Mason, Michigan             | Montgomery, North Carolina  | Orange, California         | Pointe Coupee, Louisiana   |
| Linn, Iowa              | Matanuska-Susitna, Alaska   | Montgomery, Ohio            | Orange, Florida            | Polk, Arkansas             |
| Linn, Kansas            | Maui, Hawaii                | Montgomery, Pennsylvania    | Orange, New York           | Polk, Florida              |
| Litchfield, Connecticut | Maury, Tennessee            | Montgomery, Tennessee       | Orange, Texas              | Polk, Iowa                 |
| Livingston, Illinois    | Mayes, Oklahoma             | Montgomery, Texas           | Orangeburg, South Carolina | Polk, Texas                |
| Livingston, Kentucky    | McClain, Oklahoma           | Montrose, Colorado          | Orleans, Louisiana         | Polk, Wisconsin            |
| Livingston, Louisiana   | McCracken, Kentucky         | Morgan, Alabama             | Osage, Oklahoma            | Portage, Ohio              |
| Logan, Illinois         | McCurtain, Oklahoma         | Morgan, Indiana             | Osceola, Florida           | Porter, Indiana            |
| Logan, Ohio             | McHenry, Illinois           | Morgan, Kentucky            | Oswego, New York           | Posey, Indiana             |
| Lorain, Ohio            | McIntosh, Georgia           | Morris, New Jersey          | Ottawa, Michigan           | Pottawatomie, Oklahoma     |
| Los Alamos, New Mexico  | McKenzie, North Dakota      | Muhlenberg, Kentucky        | Ottawa, Oklahoma           | Powder River, Montana      |
| Los Angeles, California | McLean, Illinois            | Multnomah, Oregon           | Ouachita, Louisiana        | Preble, Ohio               |
| Loudon, Tennessee       | McLean, Kentucky            | Murray, Georgia             | Outagamie, Wisconsin       | Prince Edward, Virginia    |
| Loudoun, Virginia       | McLennan, Texas             | Muscogee, Georgia           | Oxford, Maine              | Prince George's, Maryland  |
| Love, Oklahoma          | McMinn, Tennessee           | Muskegon, Michigan          | Ozaukee, Wisconsin         | Prince William, Virginia   |
| Lucas, Ohio             | Meade, South Dakota         | Muskogee, Oklahoma          | Page, Virginia             | Providence, Rhode Island   |
| Luna, New Mexico        | Mecklenburg, North Carolina | Napa, California            | Palm Beach, Florida        | Pulaski, Arkansas          |
| Luzerne, Pennsylvania   | Medina, Ohio                | Natrona, Wyoming            | Palo Alto, Iowa            | Pulaski, Kentucky          |
| Lycoming, Pennsylvania  | Meigs, Tennessee            | Navajo, Arizona             | Panola, Mississippi        | Putnam, New York           |
| Lyon, Minnesota         | Mendocino, California       | Navarro, Texas              | Park, Colorado             | Putnam, Tennessee          |
| Lyon, Nevada            | Merced, California          | Neosho, Kansas              | Parker, Texas              | Racine, Wisconsin          |
| Macomb, Michigan        | Mercer, New Jersey          | Nevada, California          | Pasco, Florida             | Randall, Texas             |
| Macon, Illinois         | Mercer, North Dakota        | New Castle, Delaware        | Passaic, New Jersey        | Randolph, Illinois         |
| Macon, North Carolina   | Mercer, Pennsylvania        | New Hanover, North Carolina | Paulding, Georgia          | Randolph, North Carolina   |
| Macoupin, Illinois      | Merrimack, New Hampshire    | New Haven, Connecticut      | Pawnee, Kansas             | Rensselaer, New York       |
| Madera, California      | Mesa, Colorado              | New London, Connecticut     | Pennington, South Dakota   | Richland, Montana          |
| Madison, Alabama        | Miami, Ohio                 | Newport News city, Virginia | Penobscot, Maine           | Richland, South Carolina   |
| Madison, Illinois       | Middlesex, Connecticut      | Newton, Arkansas            | Peoria, Illinois           | Richmond, Georgia          |
| Madison, Indiana        | Middlesex, Massachusetts    | Niagara, New York           | Perry, Indiana             | Riley, Kansas              |
| Madison, Mississippi    | Middlesex, New Jersey       | Noble, Ohio                 | Perry, Kentucky            | Rio Arriba, New Mexico     |
| Madison, New York       | Mille Lacs, Minnesota       | Norfolk, Massachusetts      | Perry, Missouri            | Rio Blanco, Colorado       |
| Madison, Ohio           | Milwaukee, Wisconsin        | Northampton, North Carolina | Perry, Pennsylvania        | Riverside, California      |
| Madison, Tennessee      | Minnehaha, South Dakota     | Northampton, Pennsylvania   | Person, North Carolina     | Roane, Tennessee           |
| Madison, Virginia       | Missaukee, Michigan         | Northampton, Virginia       | Philadelphia, Pennsylvania | Roanoke, Virginia          |
| Mahoning, Ohio          | Missoula, Montana           | Nueces, Texas               | Phillips, Montana          | Rock Island, Illinois      |
| Manatee, Florida        | Mobile, Alabama             | Oakland, Michigan           | Pickens, South Carolina    | Rock, Wisconsin            |
| Manistee, Michigan      | Moffat, Colorado            | Obion, Tennessee            | Pierce, Washington         | Rockbridge, Virginia       |
| Manitowoc, Wisconsin    | Monmouth, New Jersey        | Ocean, New Jersey           | Pike, Georgia              | Rockdale, Georgia          |
| Marathon, Wisconsin     | Mono, California            | Oconee, South Carolina      | Pike, Kentucky             | Rockingham, New Hampshire  |
| Maricopa, Arizona       | Monongalia, West Virginia   | Ohio, Kentucky              | Pima, Arizona              | Rockingham, North Carolina |
| Marin, California       | Monroe, Missouri            | Ohio, West Virginia         | Pinal, Arizona             | Rockingham, Virginia       |
| Marion, Florida         | Monroe, New York            | Okaloosa, Florida           | Pinellas, Florida          | Rockland, New York         |
| Marion, Indiana         | Monroe, Pennsylvania        | Oklahoma, Oklahoma          | Piscataquis, Maine         | Rockwall, Texas            |
| Marion, Texas           | Monterey, California        | Okmulgee, Oklahoma          | Pitkin, Colorado           | Rosebud, Montana           |

**Appendix Table A-4 - List of Counties in the Final Sample**

|                                   |                                 |                       |                              |                      |
|-----------------------------------|---------------------------------|-----------------------|------------------------------|----------------------|
| Rowan, North Carolina             | Snohomish, Washington           | Tarrant, Texas        | Warren, Mississippi          | Yellowstone, Montana |
| Russell, Alabama                  | Solano, California              | Taylor, Wisconsin     | Warren, New Jersey           | Yolo, California     |
| Rutherford, Tennessee             | Somerset, Maine                 | Tehama, California    | Warren, Ohio                 | York, Maine          |
| Rutland, Vermont                  | Somerset, Pennsylvania          | Teton, Wyoming        | Warren, Virginia             | York, Pennsylvania   |
| Sacramento, California            | Sonoma, California              | Tioga, Pennsylvania   | Warrick, Indiana             | York, South Carolina |
| Sagadahoc, Maine                  | Spartanburg, South Carolina     | Tippecanoe, Indiana   | Washington, Arkansas         | Yuma, Arizona        |
| Salt Lake, Utah                   | Spokane, Washington             | Tolland, Connecticut  | Washington, Kentucky         |                      |
| San Benito, California            | St. Bernard, Louisiana          | Tompkins, New York    | Washington, Maine            |                      |
| San Bernardino, California        | St. Charles, Louisiana          | Tooele, Utah          | Washington, Maryland         |                      |
| San Diego, California             | St. Charles, Missouri           | Travis, Texas         | Washington, Minnesota        |                      |
| San Francisco; coext., California | St. Clair, Illinois             | Trego, Kansas         | Washington, Ohio             |                      |
| San Joaquin, California           | St. Clair, Michigan             | Trigg, Kentucky       | Washington, Oklahoma         |                      |
| San Juan, New Mexico              | St. Croix, Wisconsin            | Trumbull, Ohio        | Washington, Oregon           |                      |
| San Juan, Utah                    | St. James, Louisiana            | Tucker, West Virginia | Washington, Pennsylvania     |                      |
| San Luis Obispo, California       | St. John the Baptist, Louisiana | Tulare, California    | Washington, Rhode Island     |                      |
| San Mateo, California             | St. Johns, Florida              | Tulsa, Oklahoma       | Washington, Utah             |                      |
| San Miguel, Colorado              | St. Joseph, Indiana             | Tuolumne, California  | Washington, Wisconsin        |                      |
| Sandoval, New Mexico              | St. Louis city, Missouri        | Tuscaloosa, Alabama   | Washoe, Nevada               |                      |
| Sangamon, Illinois                | St. Louis, Minnesota            | Tuscarawas, Ohio      | Washtenaw, Michigan          |                      |
| Santa Barbara, California         | St. Louis, Missouri             | Tuscola, Michigan     | Waukesha, Wisconsin          |                      |
| Santa Clara, California           | St. Lucie, Florida              | Tyler, Texas          | Wayne, Michigan              |                      |
| Santa Cruz, California            | St. Martin, Louisiana           | Uinta, Wyoming        | Wayne, New York              |                      |
| Santa Fe, New Mexico              | St. Mary, Louisiana             | Uintah, Utah          | Webb, Texas                  |                      |
| Santa Rosa, Florida               | St. Tammany, Louisiana          | Ulster, New York      | Weber, Utah                  |                      |
| Sarasota, Florida                 | Stafford, Virginia              | Umatilla, Oregon      | Webster, Mississippi         |                      |
| Saratoga, New York                | Stanislaus, California          | Union, New Jersey     | Weld, Colorado               |                      |
| Sauk, Wisconsin                   | Stark, Ohio                     | Union, North Carolina | West Baton Rouge, Louisiana  |                      |
| Schenectady, New York             | Ste. Genevieve, Missouri        | Union, Ohio           | Westchester, New York        |                      |
| Schoolcraft, Michigan             | Stearns, Minnesota              | Union, South Carolina | Westmoreland, Pennsylvania   |                      |
| Scott, Iowa                       | Steele, North Dakota            | Union, South Dakota   | Weston, Wyoming              |                      |
| Scott, Kentucky                   | Steuben, New York               | Utah, Utah            | Wexford, Michigan            |                      |
| Scott, Minnesota                  | Story, Iowa                     | Valencia, New Mexico  | Whatcom, Washington          |                      |
| Scotts Bluff, Nebraska            | Strafford, New Hampshire        | Van Buren, Arkansas   | White Pine, Nevada           |                      |
| Sedgwick, Kansas                  | Sublette, Wyoming               | Van Buren, Iowa       | Will, Illinois               |                      |
| Seminole, Florida                 | Suffolk city, Virginia          | Vanderburgh, Indiana  | Williams, North Dakota       |                      |
| Sequoyah, Oklahoma                | Suffolk, Massachusetts          | Ventura, California   | Williamsburg, South Carolina |                      |
| Sevier, Tennessee                 | Suffolk, New York               | Vernon, Wisconsin     | Williamson, Tennessee        |                      |
| Sharkey, Mississippi              | Sullivan, New Hampshire         | Victoria, Texas       | Wilson, Tennessee            |                      |
| Shasta, California                | Sullivan, Tennessee             | Vigo, Indiana         | Windham, Connecticut         |                      |
| Shawnee, Kansas                   | Summit, Ohio                    | Vilas, Wisconsin      | Winnebago, Illinois          |                      |
| Sheboygan, Wisconsin              | Sumner, Kansas                  | Volusia, Florida      | Winnebago, Wisconsin         |                      |
| Shelby, Alabama                   | Sumner, Tennessee               | Wabash, Indiana       | Wood, Ohio                   |                      |
| Shelby, Indiana                   | Sumter, Alabama                 | Wake, North Carolina  | Wood, West Virginia          |                      |
| Shelby, Tennessee                 | Sumter, Georgia                 | Wakulla, Florida      | Worcester, Massachusetts     |                      |
| Sheridan, Wyoming                 | Sussex, Delaware                | Walker, Alabama       | Wright, Minnesota            |                      |
| Sherman, Kansas                   | Sutter, California              | Waller, Texas         | Wyandotte, Kansas            |                      |
| Simpson, Kentucky                 | Swain, North Carolina           | Walworth, Wisconsin   | Wythe, Virginia              |                      |
| Siskiyou, California              | Sweetwater, Wyoming             | Ward, North Dakota    | Yalobusha, Mississippi       |                      |
| Skagit, Washington                | Talladega, Alabama              | Warren, Iowa          | Yancey, North Carolina       |                      |
| Smith, Texas                      | Taney, Missouri                 | Warren, Kentucky      | Yavapai, Arizona             |                      |

## **Appendix B**

Our data limitation and sample selection criteria remove a considerable portion of birth records. Indeed, our final sample consists of 1,270 counties for which we do have all atmospheric and pollution measures consistently reported for all months of the years the data is available. This limitation raises the concern that there could be characteristics in counties with data availability that make them systematically different than counties out of the sample and that these features may also play a role in driving the results. In Appendix Table B-1, we show mean value and standard deviation of selected maternal and county characteristics in the final sample versus in the original sample, i.e. the sample before merging with pollution data and the subsequent sample selections. Share of mothers with less than a college degree is 46.8 and 54.4 percent for the final and original samples, respectively. Thus, the final sample contains relatively better educated mothers. Moreover, per capita income in the final sample and original sample is roughly \$16.9K and \$13.7K, respectively. Therefore, we would expect parents with higher income to also be included in the final sample.

Our aim in this appendix is to explore whether the effects of pollution on birth outcomes is stronger/weaker among parents with better socioeconomic status and better education. We replicate the main results for the subsample of counties that are below-median county-level per capita income. The results are reported in Appendix Table B-2. Comparing the marginal effects and the implied percentage change from the mean of the outcomes with those of Table 4, one can observe larger impacts among relatively poorer counties in our final sample. In addition, we also replicate the main results for the subsample of low educated mothers. We report the results in Appendix Table B-3. We also find slightly larger effects in this subsample in comparison with the results of Table 4. Therefore, since the original sample is weighed towards lower income counties and lower educated parents, we can speculate that had we had available data for those counties we would have observed relatively larger impacts. The main results of the paper can be translated as a lower bound of the effects across the whole population.

**Appendix Table B-1 - Selected Characteristics of Samples based on Data Availability**

| Variable                                    | Final Sample |                  | Unavailable Data |                  | Difference (column 3 – column 1) |           |
|---------------------------------------------|--------------|------------------|------------------|------------------|----------------------------------|-----------|
|                                             | Mean<br>(1)  | Std. Dev.<br>(2) | Mean<br>(3)      | Std. Dev.<br>(4) | Value<br>(5)                     | SE<br>(6) |
| Age of Mother                               | 26.96        | 2.635            | 25.864           | 3.488            | -1.094                           | 0.004     |
| Mother White                                | .56          | .496             | .665             | .472             | .105                             | 0.0005    |
| Mother Black                                | .287         | .395             | .222             | .398             | -0.065                           | 0.0004    |
| Mother's Education Missing                  | .056         | .207             | .046             | .196             | -0.009                           | 0.0002    |
| Mother's Education< High School             | .024         | .06              | .024             | .091             | -0.0006                          | 0.0001    |
| Mother's Education=High School              | .444         | .23              | .52              | .311             | 0.075                            | 0.0003    |
| Mother's Education Some College             | .244         | .163             | .241             | .249             | -0.002                           | 0.0002    |
| Mother's Education Bachelor                 | .144         | .134             | .108             | .177             | -0.036                           | 0.0002    |
| Mother's Education Master-PHD               | .088         | .107             | .061             | .134             | -0.026                           | 0.0001    |
| Per Capita Personal Income, Real 1980<br>59 | 16990.4      | 4837.673         | 13726.002        | 3464.929         | -3260.438                        | 4.546     |
| % Whites                                    | 83.508       | 14.491           | 85.658           | 17.247           | 2.145                            | 0.020     |
| % Blacks                                    | 12.108       | 13.821           | 11.127           | 16.134           | -0.977                           | 0.019     |
| Observations                                | 775155       |                  | 4712187          |                  | 5487342                          |           |

**Appendix Table B-2 - Replicating the Main Results among Low Income Counties**

|                        | <i>Outcomes:</i>          |                     |                       |                           |                       |                        |                      |
|------------------------|---------------------------|---------------------|-----------------------|---------------------------|-----------------------|------------------------|----------------------|
|                        | Birth Weight              | Low Birth Weight    | Very Low Birth Weight | Full-Term Birth Weight    | Fetal Growth          | Gestational Weeks      | Very Premature Birth |
|                        | (1)                       | (2)                 | (3)                   | (4)                       | (5)                   | (6)                    | (7)                  |
| <b>Panel A.</b>        |                           |                     |                       |                           |                       |                        |                      |
| Ozone (STD)            | -27.63212**<br>(12.68908) | .00649*<br>(.00334) | .00169**<br>(.00081)  | -16.58968*<br>(9.65017)   | -.37395**<br>(.17986) | -.16318**<br>(.08116)  | .00142*<br>(.0008)   |
| Observations           | 251397                    | 251397              | 251397                | 250080                    | 251397                | 251397                 | 251397               |
| R-squared              | .05299                    | .02901              | .01484                | .04329                    | .05603                | -.01225                | .01159               |
| Mean DV                | 3305.402                  | 0.066               | 0.012                 | 3386.610                  | 85.176                | 38.800                 | 0.006                |
| %Change                | -0.836                    | 9.827               | 14.117                | -0.490                    | -0.439                | -0.421                 | 23.707               |
| F-Stat                 | 40.366                    | 54.101              | 57.933                | 33.731                    | 36.578                | 42.969                 | 42.569               |
| <b>Panel B.</b>        |                           |                     |                       |                           |                       |                        |                      |
| PM <sub>10</sub> (STD) | -21.86802***<br>(7.39138) | .0045**<br>(.00212) | .00131***<br>(.00049) | -14.87751***<br>(5.64742) | -.25605**<br>(.11614) | -.14494***<br>(.04257) | .00113**<br>(.00047) |
| Observations           | 180294                    | 180294              | 180294                | 179131                    | 180294                | 180294                 | 180294               |
| R-squared              | .09959                    | .04544              | .01983                | .07328                    | .08888                | .01542                 | .01682               |
| Mean DV                | 3305.772                  | 0.066               | 0.012                 | 3387.467                  | 85.149                | 38.816                 | 0.006                |
| %Change                | -0.662                    | 6.822               | 10.884                | -0.439                    | -0.301                | -0.373                 | 18.855               |
| F-Stat                 | 32.446                    | 49.461              | 53.851                | 26.774                    | 31.970                | 32.508                 | 43.340               |

Notes. Standard errors, clustered at the county level, are in parentheses. The regressions include mother's race dummy, child gender dummy, county-by-month fixed effects, and year-by-month fixed effects. The regressions also include average county-level parental controls including mother education (five categories), mother age, father race being white, father's ethnicity, smoker mothers, father age (10 categories), and prenatal visits. All regressions contain controls for county-level temperature and humidity. The regressions are weighted using the total number of births in each cell.

\*\*\* p<0.01, \*\* p<0.05, \* p<0.1



**Appendix Table B-3 - Replicating the Main Results among Low Educated Mothers**

|                        | <i>Outcomes:</i>           |                       |                       |                          |                        |                       |                      |
|------------------------|----------------------------|-----------------------|-----------------------|--------------------------|------------------------|-----------------------|----------------------|
|                        | Birth Weight               | Low Birth Weight      | Very Low Birth Weight | Full-Term Birth Weight   | Fetal Growth           | Gestational Weeks     | Very Premature Birth |
|                        | (1)                        | (2)                   | (3)                   | (4)                      | (5)                    | (6)                   | (7)                  |
| <b>Panel A.</b>        |                            |                       |                       |                          |                        |                       |                      |
| Ozone (STD)            | -30.51443***<br>(11.69315) | .00926***<br>(.00354) | .00231**<br>(.00108)  | -18.85966**<br>(8.79331) | -.50755***<br>(.19236) | -.13891**<br>(.0695)  | .00186**<br>(.00094) |
| Observations           | 187103                     | 187103                | 187103                | 185729                   | 187103                 | 187103                | 187103               |
| R-squared              | .02855                     | .01002                | .00566                | .0298                    | .03124                 | -.00377               | .00346               |
| Mean DV                | 3260.349                   | 0.076                 | 0.014                 | 3350.231                 | 84.255                 | 38.689                | 0.008                |
| %Change                | -0.936                     | 12.181                | 16.475                | -0.563                   | -0.602                 | -0.359                | 23.310               |
| F-Stat                 | 38.347                     | 47.774                | 36.367                | 31.620                   | 38.818                 | 34.175                | 33.900               |
| <b>Panel B.</b>        |                            |                       |                       |                          |                        |                       |                      |
| PM <sub>10</sub> (STD) | -22.70654***<br>(8.5126)   | .0071***<br>(.00215)  | .00152**<br>(.00064)  | -13.29788*<br>(6.79884)  | -.32701**<br>(.13246)  | -.12431**<br>(.05191) | .00163**<br>(.00064) |
| Observations           | 155627                     | 155627                | 155627                | 154321                   | 155627                 | 155627                | 155627               |
| R-squared              | .06355                     | .02122                | .00914                | .05494                   | .05859                 | .00522                | .00539               |
| Mean DV                | 3264.114                   | 0.075                 | 0.014                 | 3353.618                 | 84.304                 | 38.711                | 0.008                |
| %Change                | -0.696                     | 9.465                 | 10.846                | -0.397                   | -0.388                 | -0.321                | 20.423               |
| F-Stat                 | 41.802                     | 45.504                | 31.130                | 32.553                   | 36.961                 | 25.517                | 22.191               |

Notes. Standard errors, clustered at the county level, are in parentheses. The regressions include mother's race dummy, child gender dummy, county-by-month fixed effects, and year-by-month fixed effects. The regressions also include average county-level parental controls including mother education (five categories), mother age, father race being white, father's ethnicity, smoker mothers, father age (10 categories), and prenatal visits. All regressions contain controls for county-level temperature and humidity. The regressions are weighted using the total number of births in each cell.

\*\*\* p<0.01, \*\* p<0.05, \* p<0.1

## **Appendix C**

In the paper, the pollution exposure measures are assigned based on the period of pregnancy. Moreover, we show the effects for exposure across different trimesters. We also show the effects during postnatal ages as a placebo test. In this appendix, we explore the effects of lagged values of pollution. The results are reported in two panels of Appendix Table C-1. We report the results for the lagged value (pre-prenatal period assignment) and the prenatal period value of pollutants. The main effects are concentrated on prenatal development period. Except for very low birth weight and very preterm birth, all the lagged values are statistically insignificant and economically quite small in magnitude. These results suggest that the effects are primarily driven by exposure during pregnancy.

Appendix Table C-1 – Exploring the Sensitivity to Adding Lagged Values of Pollution

|                               | <i>Outcomes:</i>          |                       |                       |                           |                        |                        |                       |
|-------------------------------|---------------------------|-----------------------|-----------------------|---------------------------|------------------------|------------------------|-----------------------|
|                               | Birth Weight              | Low Birth Weight      | Very Low Birth Weight | Full-Term Birth Weight    | Fetal Growth           | Gestational Weeks      | Very Premature Birth  |
|                               | (1)                       | (2)                   | (3)                   | (4)                       | (5)                    | (6)                    | (7)                   |
| <b>Panel A.</b>               |                           |                       |                       |                           |                        |                        |                       |
| Lagged Ozone (STD)            | 5.3051<br>(4.1524)        | -.00253<br>(.00153)   | -.00115*<br>(.00065)  | 4.03964<br>(3.26531)      | .036416<br>(.08949)    | .02259<br>(.02105)     | -.00018<br>(.00013)   |
| Ozone (STD)                   | -37.34916***<br>(6.97986) | .0081***<br>(.00204)  | .00253***<br>(.00072) | -28.55872***<br>(6.48818) | -.72441***<br>(.13555) | -.11978***<br>(.04256) | .00199***<br>(.00064) |
| Observations                  | 515465                    | 515465                | 515465                | 513893                    | 515465                 | 515465                 | 515465                |
| R-squared                     | .08851                    | .05514                | .02785                | .05602                    | .07041                 | .04511                 | .02291                |
| Mean DV                       | 3309.491                  | 0.064                 | 0.012                 | 3388.886                  | 85.258                 | 38.811                 | 0.006                 |
| F-Stat                        | 59.202                    | 71.435                | 156.019               | 54.319                    | 61.456                 | 74.741                 | 134.976               |
| <b>Panel B.</b>               |                           |                       |                       |                           |                        |                        |                       |
| Lagged PM <sub>10</sub> (STD) | 2.50621<br>(5.54268)      | -.00123<br>(.00188)   | -.00087<br>(.00068)   | 2.80312<br>(4.86719)      | .11015<br>(.11036)     | -.02013<br>(.02864)    | -.00092*<br>(.00053)  |
| PM <sub>10</sub> (STD)        | -22.25927***<br>(5.16567) | .00511***<br>(.00165) | .00217***<br>(.00062) | -14.99349***<br>(4.37997) | -.38763***<br>(.0916)  | -.09037***<br>(.02828) | .00164***<br>(.0005)  |
| Observations                  | 374666                    | 374666                | 374666                | 373281                    | 374666                 | 374666                 | 374666                |
| R-squared                     | .11314                    | .0717                 | .03432                | .07427                    | .09243                 | .04512                 | .02701                |
| Mean DV                       | 3312.110                  | 0.064                 | 0.012                 | 3391.191                  | 85.277                 | 38.833                 | 0.006                 |
| F-Stat                        | 60.121                    | 64.618                | 154.711               | 48.445                    | 55.613                 | 61.167                 | 117.397               |

Notes. Standard errors, clustered at the county level, are in parentheses. The regressions include mother's race dummy, child gender dummy, county-by-month fixed effects, and year-by-month fixed effects. The regressions also include average county-level parental controls including mother education (five categories), mother age, father race being white, father's ethnicity, smoker mothers, father age (10 categories), and prenatal visits. All regressions contain controls for county-level temperature and humidity. The regressions are weighted using the total number of births in each cell.

\*\*\* p<0.01, \*\* p<0.05, \* p<0.1

## Appendix D

In the main results, we focus on levels of pollution exposure variables and atmospheric measures. One concern is that the effects could be nonlinear and using OLS only provides a linear approximation of the true effects. Therefore, once we control for the nonlinearities in the effects, we may observe larger/smaller impacts. We address the potential nonlinearity in our measures by replacing both pollution and precipitation measures with the logarithm of the values. We replicate the main results using log values and report them in Appendix Table D-1. To interpret these effects and compare them with those of Table 4, we use a one-standard-deviation change relative to the mean of pollutant based on values in Table 1. For instance, a 17.5 percent rise in ozone (6 unites (SD) relative to 29 units (mean)) is associated with about 15.9 grams lower birth weight (column 1, panel A, Appendix Table D-1). This effect is about 20 percent lower than that of reported in Table 4. Similarly, a one-standard-deviation change relative to the mean of PM<sub>10</sub> is equivalent to roughly 32 percent change. This rise in PM<sub>10</sub> is associated with roughly 14.9 grams lower birth weight (column 1, panel B, Appendix Table D-1). This change is about 23 percent lower than that of Table 4. Overall, the nonlinearities in the measures of pollution and our instruments may slightly overstate the effects.

**Appendix Table D-1 – Exploring the Nonlinearity in Pollution Using Log Values**

|                        | <i>Outcomes:</i>           |                      |                       |                           |                         |                       |                      |
|------------------------|----------------------------|----------------------|-----------------------|---------------------------|-------------------------|-----------------------|----------------------|
|                        | Birth Weight               | Low Birth Weight     | Very Low Birth Weight | Full-Term Birth Weight    | Fetal Growth            | Gestational Weeks     | Very Premature Birth |
|                        | (1)                        | (2)                  | (3)                   | (4)                       | (5)                     | (6)                   | (7)                  |
| <b>Panel A.</b>        |                            |                      |                       |                           |                         |                       |                      |
| Ozone (STD)            | -91.01341***<br>(31.26152) | .02167**<br>(.0089)  | .00368<br>(.0026)     | -67.29479**<br>(26.73985) | -1.85954***<br>(.61677) | -.24824<br>(.15395)   | .002<br>(.00218)     |
| Observations           | 446175                     | 446175               | 446175                | 444472                    | 446175                  | 446175                | 446175               |
| R-squared              | .08099                     | .05178               | .02855                | .05117                    | .06218                  | .04613                | .02425               |
| Mean DV                | 3307.467                   | 0.065                | 0.012                 | 3386.931                  | 85.221                  | 38.804                | 0.006                |
| %Change                | -2.752                     | 33.338               | 30.632                | -1.987                    | -2.182                  | -0.640                | 33.310               |
| F-Stat                 | 58.886                     | 70.925               | 156.966               | 49.389                    | 57.191                  | 67.640                | 129.300              |
| <b>Panel B.</b>        |                            |                      |                       |                           |                         |                       |                      |
| PM <sub>10</sub> (STD) | -46.89303**<br>(20.75049)  | .01036**<br>(.00499) | .00293**<br>(.00145)  | -27.50852<br>(16.83688)   | -.485<br>(.32431)       | -.3461***<br>(.11972) | .00314**<br>(.00138) |
| Observations           | 340284                     | 340284               | 340284                | 338657                    | 340284                  | 340284                | 340284               |
| R-squared              | .12732                     | .07427               | .0366                 | .0843                     | .10187                  | .05167                | .02965               |
| Mean DV                | 3310.485                   | 0.064                | 0.012                 | 3389.592                  | 85.252                  | 38.826                | 0.006                |
| %Change                | -1.417                     | 16.188               | 24.408                | -0.812                    | -0.569                  | -0.891                | 52.398               |
| F-Stat                 | 58.310                     | 59.241               | 163.835               | 48.022                    | 54.233                  | 59.061                | 133.810              |

Notes. Standard errors, clustered at the county level, are in parentheses. The regressions include mother's race dummy, child gender dummy, county-by-month fixed effects, and year-by-month fixed effects. The regressions also include average county-level parental controls including mother education (five categories), mother age, father race being white, father's ethnicity, smoker mothers, father age (10 categories), and prenatal visits. All regressions contain controls for county-level temperature and humidity. The regressions are weighted using the total number of births in each cell.

\*\*\* p<0.01, \*\* p<0.05, \* p<0.1

## **Appendix E**

One may truly argue that the effects could be heterogeneous with regards to the level of urbanicity of a county. For instance, if the counties in our final sample are more located in metropolitan statistical areas with probably better access to jobs and healthcare, the effects could reveal a mitigate effects of pollution on birth outcomes. Hence, we would observe larger effects in areas that these mitigating channels are weaker. We explore this source of heterogeneity by interacting with the pollution measures a dummy of urbanicity that equals one if the county is located in an urban metro area with population of more than 100K and zero otherwise. The results are reported in Appendix Table E-1. We observe marginal effects that are quite similar to the main effects reported in Table 4. Therefore, we do not find a discernible heterogeneity in the effects across areas that are more/less urbanized.

Appendix Table E-1 – Heterogeneity by Urbanicity

|                                | <i>Outcomes:</i>          |                       |                       |                           |                        |                       |                       |
|--------------------------------|---------------------------|-----------------------|-----------------------|---------------------------|------------------------|-----------------------|-----------------------|
|                                | Birth Weight              | Low Birth Weight      | Very Low Birth Weight | Full-Term Birth Weight    | Fetal Growth           | Gestational Weeks     | Very Premature Birth  |
|                                | (1)                       | (2)                   | (3)                   | (4)                       | (5)                    | (6)                   | (7)                   |
| <b>Panel A.</b>                |                           |                       |                       |                           |                        |                       |                       |
| Urban × Ozone (STD)            | -17.31644***<br>(4.99196) | .00366***<br>(.00131) | .00103***<br>(.0004)  | -12.92155***<br>(4.46204) | -.32921***<br>(.09095) | -.05912**<br>(.02853) | .00064*<br>(.00034)   |
| Observations                   | 535036                    | 535036                | 535036                | 532693                    | 535036                 | 535036                | 535036                |
| R-squared                      | .08818                    | .05263                | .02669                | .05675                    | .06915                 | .04661                | .02254                |
| Mean DV                        | 3309.772                  | 0.064                 | 0.012                 | 3389.140                  | 85.260                 | 38.814                | 0.006                 |
| %Change                        | -0.523                    | 5.717                 | 8.603                 | -0.381                    | -0.386                 | -0.152                | 10.718                |
| F-Stat                         | 64.234                    | 75.847                | 162.697               | 57.074                    | 66.402                 | 74.599                | 137.201               |
| <b>Panel B.</b>                |                           |                       |                       |                           |                        |                       |                       |
| Urban × PM <sub>10</sub> (STD) | -18.88979***<br>(6.68477) | .00346**<br>(.00168)  | .00125***<br>(.00047) | -12.09264**<br>(6.0993)   | -.25089**<br>(.1168)   | -.11144***<br>(.0378) | .00123***<br>(.00046) |
| Observations                   | 392417                    | 392417                | 392417                | 390266                    | 392417                 | 392417                | 392417                |
| R-squared                      | .1107                     | .06879                | .0331                 | .07243                    | .08986                 | .04404                | .02648                |
| Mean DV                        | 3312.433                  | 0.064                 | 0.012                 | 3391.491                  | 85.278                 | 38.837                | 0.006                 |
| %Change                        | -0.570                    | 5.412                 | 10.401                | -0.357                    | -0.294                 | -0.287                | 20.443                |
| F-Stat                         | 65.676                    | 66.457                | 160.746               | 52.052                    | 60.720                 | 64.913                | 125.225               |

Notes. Standard errors, clustered at the county level, are in parentheses. The regressions include mother's race dummy, child gender dummy, county-by-month fixed effects, and year-by-month fixed effects. The regressions also include average county-level parental controls including mother education (five categories), mother age, father race being white, father's ethnicity, smoker mothers, father age (10 categories), and prenatal visits. All regressions contain controls for county-level temperature and humidity. The regressions are weighted using the total number of births in each cell.

\*\*\* p<0.01, \*\* p<0.05, \* p<0.1

## **Appendix F**

In the paper, we aggregate pollution data from monitor-daily into county-monthly level. In this appendix, we validate our exposure measure by showing the association between the original monitor-daily data (for counties that are present in the final sample) and the county-monthly measures in the final sample. The results are reported in Appendix Table F-1. The marginal effects suggest strong and sizeable associations even after including county-month fixed effects. A one-standard-deviation rise in ozone and  $PM_{10}$  at the monitor-daily level is correlated with 0.37 and 0.50 standard-deviations change in the county-monthly measures, respectively.



**Appendix Table F-1 - Relationship between Monitor-Daily Pollution and County-Monthly Pollution Data**

|                        | County-by-Month Pollution Exposure Measures as Outcomes: |                         |                          |                        |
|------------------------|----------------------------------------------------------|-------------------------|--------------------------|------------------------|
|                        | PM <sub>10</sub> (STD)                                   |                         | Ozone (STD)              |                        |
|                        | (1)                                                      | (2)                     | (3)                      | (4)                    |
| PM <sub>10</sub> (STD) | 0.32148***<br>(0.03969)                                  | 0.37554***<br>(0.05144) |                          |                        |
| Ozone (STD)            |                                                          |                         | -0.45081***<br>(0.08238) | 0.50484***<br>(0.1205) |
| Observations           | 2226948                                                  | 2226948                 | 2255808                  | 2255803                |
| R-squared              | 0.95485                                                  | 0.9573                  | 0.9825                   | 0.98639                |
| County FE              | Yes                                                      | Yes                     | Yes                      | Yes                    |
| Year-Month FE          | Yes                                                      | Yes                     | Yes                      | Yes                    |
| County-Month FE        | No                                                       | Yes                     | No                       | Yes                    |

Notes. Standard errors, clustered at the county level, are in parentheses. The regressions are weighted using the total number of births in each cell.

\*\*\* p<0.01, \*\* p<0.05, \* p<0.1

## **Appendix G**

Another important pollutant with potentially higher penetration into lungs is particulate matters less than  $2.5 \mu m$ , or  $PM_{2.5}$  (49,50). As an additional analysis to complement the results of the paper, we use the same empirical method and use average county-level  $PM_{2.5}$  as the endogenous pollutant. The results are reported in Appendix Table G-1. We observe consistently larger impacts across all birth outcomes compared with the effects of  $PM_{10}$  or ozone. For instance, a one-standard-deviation rise in  $PM_{2.5}$  is associated with about 54 grams lower birth weight, roughly 2.6 times that of the effects of  $PM_{10}$  or ozone.

**Appendix Table G-1 - Replicating the Main Results Using PM<sub>2.5</sub> as the Endogenous Pollutant**

|                         | <i>Outcomes:</i>           |                      |                       |                            |                         |                        |                      |
|-------------------------|----------------------------|----------------------|-----------------------|----------------------------|-------------------------|------------------------|----------------------|
|                         | Birth Weight               | Low Birth Weight     | Very Low Birth Weight | Full-Term Birth Weight     | Fetal Growth            | Gestational Weeks      | Very Premature Birth |
|                         | (1)                        | (2)                  | (3)                   | (4)                        | (5)                     | (6)                    | (7)                  |
| PM <sub>2.5</sub> (STD) | -54.26724***<br>(12.30111) | .01509***<br>(.0051) | .0065***<br>(.00223)  | -27.71603***<br>(10.00219) | -1.02494***<br>(.27204) | -.18955***<br>(.05317) | .00394**<br>(.00164) |
| Observations            | 193637                     | 193637               | 193637                | 192506                     | 193637                  | 193637                 | 193637               |
| R-squared               | -.09391                    | -.01608              | -.04815               | -.00174                    | -.05052                 | -.083                  | -.02865              |
| Mean DV                 | 3294.338                   | 0.065                | 0.012                 | 3373.479                   | 85.036                  | 38.736                 | 0.006                |
| %Change                 | -1.647                     | 23.211               | 54.199                | -0.822                     | -1.205                  | -0.489                 | 65.604               |
| F-Stat                  | 844.591                    | 572.316              | 306.840               | 579.772                    | 729.559                 | 399.378                | 232.730              |

Notes. Standard errors, clustered at the county level, are in parentheses. The regressions include mother's race dummy, child gender dummy, county-by-month fixed effects, and year-by-month fixed effects. The regressions also include average county-level parental controls including mother education (five categories), mother age, father race being white, father's ethnicity, smoker mothers, father age (10 categories), and prenatal visits. All regressions contain controls for county-level temperature and humidity. The regressions are weighted using the total number of births in each cell.

\*\*\* p<0.01, \*\* p<0.05, \* p<0.1

## Appendix H

One important source of seasonal pollution is wildfire smokes. A strand of literature in various disciplines examine the impact of wildfire smoke on birth outcomes (51–55). Since precipitation is also seasonal, one could argue that wildfire smokes may confound the results. In Appendix Table H-1, we replicate the main results adding a set of county by year-month measures of wildfire smokes.<sup>1</sup> Although we observe small reductions in the marginal effects relative to the main results, the effects remain statistically and economically meaningful.

---

<sup>1</sup> This data is extracted from <https://www.kaggle.com/datasets/rtatman/188-million-us-wildfires>.

**Appendix Table H-1 - Replicating the Main Results Controlling for County-Level Wildfire Smokes**

|                        | <i>Outcomes:</i>          |                      |                       |                          |                        |                        |                       |
|------------------------|---------------------------|----------------------|-----------------------|--------------------------|------------------------|------------------------|-----------------------|
|                        | Birth Weight              | Low Birth Weight     | Very Low Birth Weight | Full-Term Birth Weight   | Fetal Growth           | Gestational Weeks      | Very Premature Birth  |
|                        | (1)                       | (2)                  | (3)                   | (4)                      | (5)                    | (6)                    | (7)                   |
| <b><i>Panel A.</i></b> |                           |                      |                       |                          |                        |                        |                       |
| Ozone (STD)            | -17.86311***<br>(5.6558)  | .00315**<br>(.00131) | .00109***<br>(.00039) | -12.92633**<br>(5.15331) | -.36879***<br>(.10189) | -.04647<br>(.0301)     | .00072**<br>(.00035)  |
| Observations           | 525138                    | 525138               | 525138                | 522877                   | 525138                 | 525138                 | 525138                |
| R-squared              | .08769                    | .05334               | .02641                | .05747                   | .06747                 | .04974                 | .02228                |
| Mean DV                | 3309.712                  | 0.064                | 0.012                 | 3389.061                 | 85.261                 | 38.812                 | 0.006                 |
| %Change                | -0.540                    | 4.928                | 9.070                 | -0.381                   | -0.433                 | -0.120                 | 12.037                |
| F-Stat                 | 52.353                    | 78.480               | 127.094               | 44.342                   | 48.932                 | 69.238                 | 112.780               |
| <b><i>Panel B.</i></b> |                           |                      |                       |                          |                        |                        |                       |
| PM <sub>10</sub> (STD) | -19.57911***<br>(6.63679) | .00339**<br>(.00161) | .00137***<br>(.00047) | -12.57575**<br>(6.36289) | -.30463**<br>(.11883)  | -.09538***<br>(.03668) | .00127***<br>(.00041) |
| Observations           | 380439                    | 380439               | 380439                | 378392                   | 380439                 | 380439                 | 380439                |
| R-squared              | .11283                    | .06902               | .03278                | .07503                   | .09065                 | .05063                 | .02646                |
| Mean DV                | 3312.382                  | 0.064                | 0.012                 | 3391.363                 | 85.277                 | 38.836                 | 0.006                 |
| %Change                | -0.591                    | 5.303                | 11.427                | -0.371                   | -0.357                 | -0.246                 | 21.121                |
| F-Stat                 | 47.681                    | 59.850               | 137.820               | 36.671                   | 42.201                 | 52.532                 | 108.721               |

Notes. Standard errors, clustered at the county level, are in parentheses. The regressions include mother's race dummy, child gender dummy, county-by-month fixed effects, and year-by-month fixed effects. The regressions also include average county-level parental controls including mother education (five categories), mother age, father race being white, father's ethnicity, smoker mothers, father age (10 categories), and prenatal visits. All regressions contain controls for county-level temperature and humidity. The regressions are weighted using the total number of births in each cell.

\*\*\* p<0.01, \*\* p<0.05, \* p<0.1

## **Appendix I**

The exclusion restriction assumption in the identifications strategy of the paper requires that the instruments do not have a direct impact on the outcomes except through changes in the endogenous regressors. To show that this is the case, we explore the direct association between precipitation and birth outcomes, controlling for pollution variables of interest. The results are reported in Appendix Table I-1. We do not observe a link between precipitation and infants' health once we implement a full model. The marginal effects are very small in magnitude and statistically insignificant.

**Appendix Table I-1 - The Direct Link between Precipitation and Birth Outcomes**

|                     | <i>Outcomes:</i>    |                    |                       |                        |                    |                    |                      |
|---------------------|---------------------|--------------------|-----------------------|------------------------|--------------------|--------------------|----------------------|
|                     | Birth Weight        | Low Birth Weight   | Very Low Birth Weight | Full-Term Birth Weight | Fetal Growth       | Gestational Weeks  | Very Premature Birth |
|                     | (1)                 | (2)                | (3)                   | (4)                    | (5)                | (6)                | (7)                  |
| Precipitation (STD) | 1.04937<br>(.76771) | -.00025<br>(.0002) | -.00011<br>(.00008)   | .89128<br>(.71388)     | .02041<br>(.02199) | -.04647<br>(.0301) | .0002<br>(.0005)     |
| Observations        | 341539              | 341539             | 341539                | 341261                 | 341539             | 341539             | 341539               |
| R-squared           | .64949              | .27409             | .11169                | .66887                 | .64123             | .04974             | .02228               |
| Mean DV             | 3313.020            | 0.064              | 0.011                 | 3391.935               | 85.323             | 38.812             | 0.006                |
| %Change             | 0.047               | -0.392             | -1.136                | 0.029                  | 0.030              | -0.120             | 3.037                |

Notes. Standard errors, clustered at the county level, are in parentheses. The regressions include mother's race dummy, child gender dummy, county-by-month fixed effects, and year-by-month fixed effects. The regressions also include average county-level parental controls including mother education (five categories), mother age, father race being white, father's ethnicity, smoker mothers, father age (10 categories), and prenatal visits. All regressions contain controls for county-level pollution, temperature, and humidity. The regressions are weighted using the total number of births in each cell.

\*\*\* p<0.01, \*\* p<0.05, \* p<0.1

## Appendix J

**Endogeneity Concerns.** There are three concerns that threaten the validity of our instrument which we discuss below. First, there is seasonality in precipitation that could be also observed in birth outcomes (56). To control for all unobserved factors related to seasonality in birth, instruments, and pollution measures, we allow for fixed effects of the county to vary by month of birth. We also interact birth-month fixed effects with birth-year fixed effects in our model. Therefore, we use the variation of within county-month and within month-year-of-birth. Although we are aware that the inclusion of fixed effects does not completely absorb seasonality in the effects, we expect that a large portion of confounding effects of seasonality is captured by this comprehensive set of fixed effects.

Second, another concern is the potential association between compositional change in birth outcome and our instruments. For instance, if parents systematically chose to give birth in specific months of the year and this decision varies by their characteristics, then our instruments pick up on those characteristics rather than providing exogenous variations. We explore this source by implementing a series of balancing tests where the outcome is parental characteristics and the explanatory variables are standardized values of precipitation. These regressions are conditional on county-by-month and year-by-month fixed effects. The results are reported in Appendix Table J-1. There is no significant association between precipitation and mother age, race, education, smoker status, having any prenatal visits, father age, and father race. The marginal effects are statistically insignificant and economically quite small. For instance, a one-standard-deviation change in precipitation is correlated with a 0.06 percent change (from the mean) of the share of nonwhite mothers. Overall, these findings do not provide convincing evidence that selective fertility could hinder the exclusion restriction assumption. However, we should note that the range



of parental outcomes studied in Appendix Table J-1 is limited and is restricted to sociodemographic features. Parents may choose birth timing and also exercise pollution avoidance based on their cultural opinions and religious values. Unfortunately, our data does not provide any information regarding these variables. Therefore, there is remaining uncertainty about the influence of these characteristics in delivery timing.

Third, it is also possible to assume that county demographic composition and socioeconomic characteristics respond to changes in precipitation. For instance, a steady reductions in precipitation may hamper the agricultural sector and force out-migration of specific subpopulations (57). Since sociodemographic characteristics could, in many ways, influence birth outcomes, such demographic shifts could threaten the validity of our instruments. To explore this concern, we regress a series of county-level characteristics on precipitation conditioning on county-month and year-month fixed effects. The results are reported in Appendix Table J-2. We do not observe consistent and strong evidence of this source of endogeneity. For instance, a one-standard-deviation change in precipitation is correlated with 0.2 percent change in the share of blacks, 34 dollars lower per capita income (off a mean of \$18K), 0.6 dollar lower weekly wage (off a mean of \$428), and 0.3 percent lower share of manufacturing. These effects are quite small in magnitude and in almost all cases statistically insignificant at 10 percent level.

**Placebo Tests.** To better validate the results of Table 4 and provide evidence that the exposure during in-utero rather than other periods drives the main results, we implement a series of placebo tests in which we assign air pollution measures for the time infants are two years old. We expect that postnatal exposure to pollution should not reveal any negative effects on birth outcomes. We replicate the two-stage-least-square instrumental-variable estimates and report the results in Appendix Table J-3. There is no significant association between postnatal air pollution

and birth outcomes. All the marginal effects are quite small in magnitude and statistically insignificant.

**Robustness Check.** In Appendix Table J-4, we explore the robustness of the main results to alternative specifications. In panel A, we allow for county fixed effects to vary by gender and race of the child. We assume that the time-invariant features of the county could have unobserved effects on birth outcomes that differ by gender and race. The interaction of county-gender and county-race fixed effects accounts for these unobserved factors. We observe similar coefficients for both ozone and PM<sub>10</sub> and for all outcomes. These effects are quite comparable with our findings of Table 4.

In the main analyses, we avoid including any county-level controls as these controls are highly collinear with air pollution and absorb much of the variations in our identification. However, in panel B of Appendix Table J-4, we include a series of county and state-level controls. County controls include per capita income, per capita unemployment insurance payments, per capita dividend income, average weekly wage, percentage of employment in manufacturing, percentage of employment in construction industries, percentage of whites, percentage of blacks, percentage of males, and percentage of people aged 25-65. State-level controls include per capita gross state product, unemployment rate, union coverage rate, Medicaid coverage rate, welfare reform, per capita income maintenance benefit, per capita current transfer receipts, and minimum wage. We observe slight reductions in the marginal effects. For instance, the effects of ozone and PM<sub>10</sub> on low birth weight drop from 0.0041-0.0037 in the main results to around 0.0023-0.0034 in panels B1 and B2 of Appendix Table J-4.

Appendix Table J-1 - Exploring for Endogenous Fertility

|                     | <i>Outcomes:</i>    |                    |                          |                                 |                                 |                                 |                             |                               |                    |                     |                    |                     |
|---------------------|---------------------|--------------------|--------------------------|---------------------------------|---------------------------------|---------------------------------|-----------------------------|-------------------------------|--------------------|---------------------|--------------------|---------------------|
|                     | Mother Age          | Is Mother Nonwhite | Mother Education Missing | Mother's Education< High School | Mother's Education= High School | Mother's Education Some College | Mother's Education Bachelor | Mother's Education Master-PhD | Is Mother Smoker   | Any Prenatal Visits | Is Father Nonwhite | Father Age<30       |
|                     | (1)                 | (2)                | (3)                      | (4)                             | (5)                             | (6)                             | (7)                         | (8)                           | (9)                | (10)                | (11)               | (12)                |
| Precipitation (STD) | -.02981<br>(.02216) | .00017<br>(.00149) | .00513<br>(.00686)       | -.00061<br>(.001)               | -.00227<br>(.00305)             | -.00099<br>(.00252)             | -.00224<br>(.0019)          | .00098<br>(.00131)            | -.0043<br>(.00321) | .00155<br>(.00252)  | .00049<br>(.00168) | -.00075<br>(.00108) |
| Observations        | 665833              | 665833             | 665833                   | 665833                          | 665833                          | 665833                          | 665833                      | 665833                        | 665833             | 665833              | 665833             | 665833              |
| R-squared           | .68095              | .96202             | .29683                   | .49758                          | .56369                          | .30447                          | .44968                      | .44444                        | .52638             | .27642              | .92452             | .49915              |
| Mean DV             | 27.625              | 0.284              | 0.050                    | 0.034                           | 0.416                           | 0.230                           | 0.167                       | 0.103                         | 0.074              | 0.949               | 0.412              | 0.163               |

Notes. Standard errors, clustered at the county level, are in parentheses. The regressions include county-by-month fixed effects and year-by-month fixed effects. The regressions are weighted using the total number of births in each cell.

\*\*\* p<0.01, \*\* p<0.05, \* p<0.1

**Appendix Table J-2 - Exploring for Endogeneity of Instruments with Respect to County Demographic and Socioeconomic Characteristics**

|                     | <i>Outcomes:</i>   |                     |                     |                       |                                                   |                        |                                                |                                             |
|---------------------|--------------------|---------------------|---------------------|-----------------------|---------------------------------------------------|------------------------|------------------------------------------------|---------------------------------------------|
|                     | %Blacks            | %Whites             | %Males              | %Individuals<br>25-55 | Real Per<br>Capita Income<br>(in 1980<br>dollars) | Average<br>Weekly Wage | Real Per<br>Capita Rent-<br>Dividend<br>Income | Share of<br>Manufacturin<br>g<br>Employment |
|                     | (1)                | (2)                 | (3)                 | (4)                   | (5)                                               | (6)                    | (7)                                            | (8)                                         |
| Precipitation (STD) | .03344<br>(.02402) | -.03957<br>(.02476) | -.00595<br>(.00396) | .02155<br>(.01397)    | -34.63578<br>(23.81485)                           | .59121<br>(.41258)     | -4.53999<br>(8.56365)                          | -.00818<br>(.00582)                         |
| Observations        | 1337387            | 1337387             | 1337387             | 1337387               | 1319189                                           | 1337387                | 1319189                                        | 1312821                                     |
| R-squared           | .9992              | .99921              | .98365              | .98908                | .986                                              | .95695                 | .98091                                         | .98643                                      |
| Mean DV             | 13.903             | 79.338              | 49.081              | 52.352                | 1.8e+04                                           | 387.699                | 3564.765                                       | 2.989                                       |

Notes. Standard errors, clustered at the county level, are in parentheses. The regressions include county-by-month fixed effects and year-by-month fixed effects. The regressions are weighted using the total number of births in each cell.

\*\*\* p<0.01, \*\* p<0.05, \* p<0.1

**Appendix Table J-3 - Placebo Tests: Assigning Pollution at Age 2**

|                        | Outcomes:             |                    |                       |                        |                     |                     |                      |
|------------------------|-----------------------|--------------------|-----------------------|------------------------|---------------------|---------------------|----------------------|
|                        | Birth Weight          | Low Birth Weight   | Very Low Birth Weight | Full-Term Birth Weight | Fetal Growth        | Gestational Weeks   | Very Premature Birth |
|                        | (1)                   | (2)                | (3)                   | (4)                    | (5)                 | (6)                 | (7)                  |
|                        | <i>Panel A.</i>       |                    |                       |                        |                     |                     |                      |
| Ozone (STD)            | -1.25462<br>(1.48365) | .00022<br>(.00055) | .00023<br>(.0003)     | -0.932729<br>(0.9967)  | -.04196<br>(.06073) | -.02836<br>(.01945) | .00035<br>(.00026)   |
| Observations           | 523312                | 523312             | 523312                | 521017                 | 523312              | 523312              | 523312               |
| R-squared              | .10732                | .05809             | .02855                | .07427                 | .08443              | .05366              | .02387               |
| Mean DV                | 3311.889              | 0.064              | 0.012                 | 3391.180               | 85.283              | 38.828              | 0.006                |
| F-Stat                 | 62.715                | 81.340             | 162.808               | 56.585                 | 65.619              | 66.604              | 125.570              |
|                        | <i>Panel B.</i>       |                    |                       |                        |                     |                     |                      |
| PM <sub>10</sub> (STD) | -2.39068<br>(2.01762) | .00082<br>(.00049) | .00022<br>(.00016)    | -1.68589<br>(1.74147)  | -.05254<br>(.03566) | -.01949<br>(.01073) | .00021<br>(.00014)   |
| Observations           | 370976                | 370976             | 370976                | 368936                 | 370976              | 370976              | 370976               |
| R-squared              | .13787                | .07482             | .03612                | .09436                 | .10602              | .06881              | .03077               |
| Mean DV                | 3314.655              | 0.064              | 0.012                 | 3393.556               | 85.295              | 38.855              | 0.006                |
| F-Stat                 | 62.312                | 81.521             | 141.114               | 52.328                 | 59.324              | 59.108              | 113.159              |

Notes. Standard errors, clustered at the county level, are in parentheses. The regressions include mother's race dummy, child gender dummy, county-by-month fixed effects, and year-by-month fixed effects. The regressions also include average county-level parental controls including mother education (five categories), mother age, father race being white, father's ethnicity, smoker mothers, father age (10 categories), and prenatal visits. All regressions contain controls for county-level temperature and humidity. The regressions are weighted using the total number of births in each cell.

\*\*\* p<0.01, \*\* p<0.05, \* p<0.1

**Appendix Table J-4 - Robustness of the Main Results to Alternative Specifications**

|                                                                          | Outcomes:                 |                      |                       |                          |                        |                        |                       |
|--------------------------------------------------------------------------|---------------------------|----------------------|-----------------------|--------------------------|------------------------|------------------------|-----------------------|
|                                                                          | Birth Weight              | Low Birth Weight     | Very Low Birth Weight | Full-Term Birth Weight   | Fetal Growth           | Gestational Weeks      | Very Premature Birth  |
|                                                                          | (1)                       | (2)                  | (3)                   | (4)                      | (5)                    | (6)                    | (7)                   |
| <b>Panel A. Adding County-by-Gender and County-by-Race Fixed Effects</b> |                           |                      |                       |                          |                        |                        |                       |
| <b>Panel A1.</b>                                                         |                           |                      |                       |                          |                        |                        |                       |
| Ozone (STD)                                                              | -18.6035***<br>(6.38252)  | .00354**<br>(.0016)  | .00102**<br>(.00047)  | -13.33241**<br>(5.87393) | -.35454***<br>(.11498) | -.06206*<br>(.03543)   | .00069*<br>(.00041)   |
| Observations                                                             | 535035                    | 535035               | 535035                | 532692                   | 535035                 | 535035                 | 535035                |
| R-squared                                                                | .00975                    | .00629               | .00264                | .00985                   | .0111                  | .00539                 | .0026                 |
| Mean DV                                                                  | 3309.772                  | 0.064                | 0.012                 | 3389.140                 | 85.260                 | 38.814                 | 0.006                 |
| <b>Panel A2.</b>                                                         |                           |                      |                       |                          |                        |                        |                       |
| PM <sub>10</sub> (STD)                                                   | -17.66081***<br>(6.27612) | .00358**<br>(.00157) | .00133***<br>(.00048) | -10.47613*<br>(6.22715)  | -.23294**<br>(.11388)  | -.10572***<br>(.03568) | .00129***<br>(.00045) |
| Observations                                                             | 392415                    | 392415               | 392415                | 390264                   | 392415                 | 392415                 | 392415                |
| R-squared                                                                | .01542                    | .00804               | .00112                | .01702                   | .01963                 | -.0074                 | -.0006                |
| Mean DV                                                                  | 3312.433                  | 0.064                | 0.012                 | 3391.491                 | 85.278                 | 38.837                 | 0.006                 |
| <b>Panel B. Adding County/State Controls</b>                             |                           |                      |                       |                          |                        |                        |                       |
| <b>Panel B1.</b>                                                         |                           |                      |                       |                          |                        |                        |                       |
| Ozone (STD)                                                              | -17.96992***<br>(5.71289) | .0032**<br>(.00131)  | .0011***<br>(.0004)   | -12.96867**<br>(5.19932) | -.37069***<br>(.10282) | -.04692<br>(.03046)    | .00074**<br>(.00035)  |
| Observations                                                             | 525138                    | 525138               | 525138                | 522877                   | 525138                 | 525138                 | 525138                |
| R-squared                                                                | .08754                    | .0533                | .02638                | .05741                   | .06736                 | .04966                 | .02225                |
| Mean DV                                                                  | 3309.712                  | 0.064                | 0.012                 | 3389.061                 | 85.261                 | 38.812                 | 0.006                 |
| <b>Panel B2.</b>                                                         |                           |                      |                       |                          |                        |                        |                       |
| PM <sub>10</sub> (STD)                                                   | -20.07057***<br>(6.72598) | .00338**<br>(.00161) | .00137***<br>(.00048) | -13.01564**<br>(6.44764) | -.31389***<br>(.12017) | -.09694***<br>(.03733) | .00126***<br>(.00042) |
| Observations                                                             | 380439                    | 380439               | 380439                | 378392                   | 380439                 | 380439                 | 380439                |
| R-squared                                                                | .11208                    | .06908               | .03277                | .07438                   | .09015                 | .05027                 | .02652                |
| Mean DV                                                                  | 3312.382                  | 0.064                | 0.012                 | 3391.363                 | 85.277                 | 38.836                 | 0.006                 |

Notes. Standard errors, clustered at the county level, are in parentheses. The regressions include mother's race dummy, child gender dummy, county-by-month fixed effects, and year-by-month fixed effects. The regressions also include average county-level parental controls including mother education (five categories), mother age, father race being white, father's ethnicity, smoker mothers, father age (10 categories), and prenatal visits. All regressions contain controls for county-level temperature and humidity. The regressions are weighted using the total number of births in each cell. County controls include per capita income, per capita unemployment insurance payments, per capita dividend income, average weekly wage, percentage employment in manufacturing, percentage employment in construction industries, percentage of whites, percentage of blacks, percentage of males, and percentage of people aged 25-65. State-level controls include per capita gross state product, unemployment rate, union coverage rate, Medicaid coverage rate, welfare reform, per capita income maintenance benefit, per capita current transfer receipts, and minimum wage.

\*\*\* p<0.01, \*\* p<0.05, \* p<0.1

## Appendix K

**Heterogeneity across Trimesters.** Studies show that the effects of air pollution on birth outcomes could be heterogeneous across trimesters of pregnancy and suggest that they are more pronounced during second and third trimesters (3,18,58,59). We explore this source of heterogeneity by assigning pollution at different trimesters and evaluate the effects of pollution on the birth outcomes for each trimester using the same two-stage-least-square instrumental-variable approach as the main results. The estimated effects are reported in two panels of Appendix Table K-1. The effects appear to be slightly larger in the second and third trimesters specifically for  $PM_{10}$  exposure. For instance, a one-standard-deviation rise in  $PM_{10}$  during the first, second, and third trimesters is associated with a 13.4, 16.8, and 18.7 grams reduction in birth weight, respectively (panel B, column 1). We observe a similar pattern for other outcomes. A one-standard-deviation change in ozone during first, second, and third is associated with 0.39, 0.46, and 0.41 grams/week reductions in fetal growth, respectively. Therefore, the evidence points to the relevance of later months of pregnancy for the adverse impacts of air pollution on infants' health outcomes. However, we should note that infants' health outcomes studied here refer to their physical growth outcomes and excludes other measures of health outcomes such as mental health, congenital malformation, fetal deaths, abortions, recognized syndromes, and various anomalies and abnormalities.

**Appendix Table K-1 - Heterogeneity of the Effects across Trimesters**

|                                                              | Outcomes:                 |                         |                              |                               |                        |                          |                             |
|--------------------------------------------------------------|---------------------------|-------------------------|------------------------------|-------------------------------|------------------------|--------------------------|-----------------------------|
|                                                              | Birth Weight<br>(1)       | Low Birth Weight<br>(2) | Very Low Birth Weight<br>(3) | Full-Term Birth Weight<br>(4) | Fetal Growth<br>(5)    | Gestational Weeks<br>(6) | Very Premature Birth<br>(7) |
| <b>Panel A. IDV: Ozone (STD) across Trimesters</b>           |                           |                         |                              |                               |                        |                          |                             |
| First Trimester                                              | -21.67556***<br>(5.83785) | .00452***<br>(.00151)   | .00136***<br>(.00042)        | -15.66759***<br>(5.16372)     | -.39834***<br>(.09871) | -.07813**<br>(.03406)    | .0011***<br>(.00039)        |
| Observations                                                 | 527079                    | 527079                  | 527079                       | 524792                        | 527079                 | 527079                   | 527079                      |
| R-squared                                                    | .08429                    | .05198                  | .02622                       | .05445                        | .06696                 | .04351                   | .02133                      |
| Second Trimester                                             | -24.22917***<br>(6.88614) | .00485***<br>(.00178)   | .00151***<br>(.00047)        | -17.46817***<br>(6.01997)     | -.45567***<br>(.11693) | -.08329**<br>(.03997)    | .00115***<br>(.00044)       |
| Observations                                                 | 530369                    | 530369                  | 530369                       | 528045                        | 530369                 | 530369                   | 530369                      |
| R-squared                                                    | .0779                     | .05079                  | .02549                       | .04984                        | .06188                 | .04078                   | .02084                      |
| Third Trimester                                              | -21.11832***<br>(6.42056) | .00423**<br>(.00165)    | .00118***<br>(.00044)        | -15.33635***<br>(5.6797)      | -.40621***<br>(.11237) | -.06815*<br>(.03678)     | .00088**<br>(.0004)         |
| Observations                                                 | 533510                    | 533510                  | 533510                       | 531301                        | 533510                 | 533510                   | 533510                      |
| R-squared                                                    | .08231                    | .05182                  | .02761                       | .0521                         | .06452                 | .04496                   | .02453                      |
| <b>Panel B. IDV: PM<sub>10</sub> (STD) across Trimesters</b> |                           |                         |                              |                               |                        |                          |                             |
| First Trimester                                              | -13.41283***<br>(3.67413) | .00267***<br>(.00091)   | .00093***<br>(.00029)        | -9.15798***<br>(3.31144)      | -.20663***<br>(.06261) | -.06672***<br>(.02107)   | .0008***<br>(.00028)        |
| Observations                                                 | 377837                    | 377837                  | 377837                       | 375759                        | 377837                 | 377837                   | 377837                      |
| R-squared                                                    | .11821                    | .06981                  | .03403                       | .07696                        | .0926                  | .05606                   | .0283                       |
| Second Trimester                                             | -16.86215***<br>(5.21495) | .00316**<br>(.00131)    | .00119***<br>(.00038)        | -11.21681**<br>(4.67153)      | -.24704***<br>(.08947) | -.08981***<br>(.02952)   | .00108***<br>(.00037)       |
| Observations                                                 | 383790                    | 383790                  | 383790                       | 381665                        | 383790                 | 383790                   | 383790                      |
| R-squared                                                    | .11368                    | .06903                  | .03332                       | .07405                        | .09065                 | .04961                   | .02715                      |
| Third Trimester                                              | -18.75114***<br>(6.09378) | .00351**<br>(.00154)    | .00127***<br>(.00044)        | -12.17497**<br>(5.54282)      | -.27032**<br>(.10607)  | -.10164***<br>(.03473)   | .00124***<br>(.00043)       |
| Observations                                                 | 389640                    | 389640                  | 389640                       | 387599                        | 389640                 | 389640                   | 389640                      |
| R-squared                                                    | .11203                    | .06914                  | .03518                       | .0723                         | .0905                  | .04647                   | .03021                      |

Notes. Standard errors, clustered at the county level, are in parentheses. The regressions include mother's race dummy, child gender dummy, county-by-month fixed effects, and year-by-month fixed effects. The regressions also include average county-level parental controls including mother



---

education (five categories), mother age, father race being white, father's ethnicity, smoker mothers, father age (10 categories), and prenatal visits. All regressions contain controls for county-level temperature and humidity. The regressions are weighted using the total number of births in each cell.  
\*\*\*  $p < 0.01$ , \*\*  $p < 0.05$ , \*  $p < 0.1$
